# Supplementary material for: Selective recognition of luteolin and quercetin based on the specific interaction of ortho-dihydroxy substituents with a zinc(ii) complex
Source: Royal Society of Chemistry journal article supplement (doi:10.1039/c4ay00066h), 2014-01-01
Supplement: c4ay00066h1.pdf [file c4ay00066h1.pdf]

## Supporting Information

*for*

### Selective recognition of luteolin and quercetin based on the specific interaction of ortho-dihydroxy substituents with a Zinc(II) complex

Bowen Xiao,<sup>a</sup> Huijuan Wang,<sup>a</sup> Xijuan Zhao,<sup>\*b</sup> Yuanfang Li<sup>\*a</sup>

<sup>a</sup>Key Laboratory of Luminescence and Real-Time Analytical Chemistry (Southwest University), Ministry of Education, College of Chemistry and Chemical Engineering, Southwest University, Chongqing, 400715, PR China. Fax: (+86) 23 68367257; Tel: (+86) 23 68254659; E-mail: [liyf@swu.edu.cn](mailto:liyf@swu.edu.cn)

<sup>b</sup>College of Horticulture and Landscape Architecture, Southwest University, Chongqing 400716, PR China. E-mail: [xijuanzh@swu.edu.cn](mailto:xijuanzh@swu.edu.cn)

#### HPLC Analysis

The chromatographic separation was carried out on a Hitachi L-2000 HPLC system consisting of an auto-sampler and binary pump system coupled with a UV-Vis detector. 20  $\mu\text{L}$  of each sample solution was injected and analyzed by a Eclipse XBD-C18 column ( $4.6 \times 150$  mm,  $3.5 \mu\text{m}$ ) and the chromatogram was acquired at 350 nm for luteolin. The solvent system was a binary mobile phase: solution A was Milli-Q water containing 0.2% (*V:V*) phosphoric acid, solution B was methanol, and all the reagents were HPLC grade. The column temperature was kept at  $25^\circ\text{C}$  and the flow rate was  $1\text{ mL} \cdot \text{min}^{-1}$ .

---

\* Corresponding author. Tel.: +86-23-68254659; Fax: +86-23-68367257;  
E-mail address: [xijuanzh@swu.edu.cn](mailto:xijuanzh@swu.edu.cn), [liyf@swu.edu.cn](mailto:liyf@swu.edu.cn)

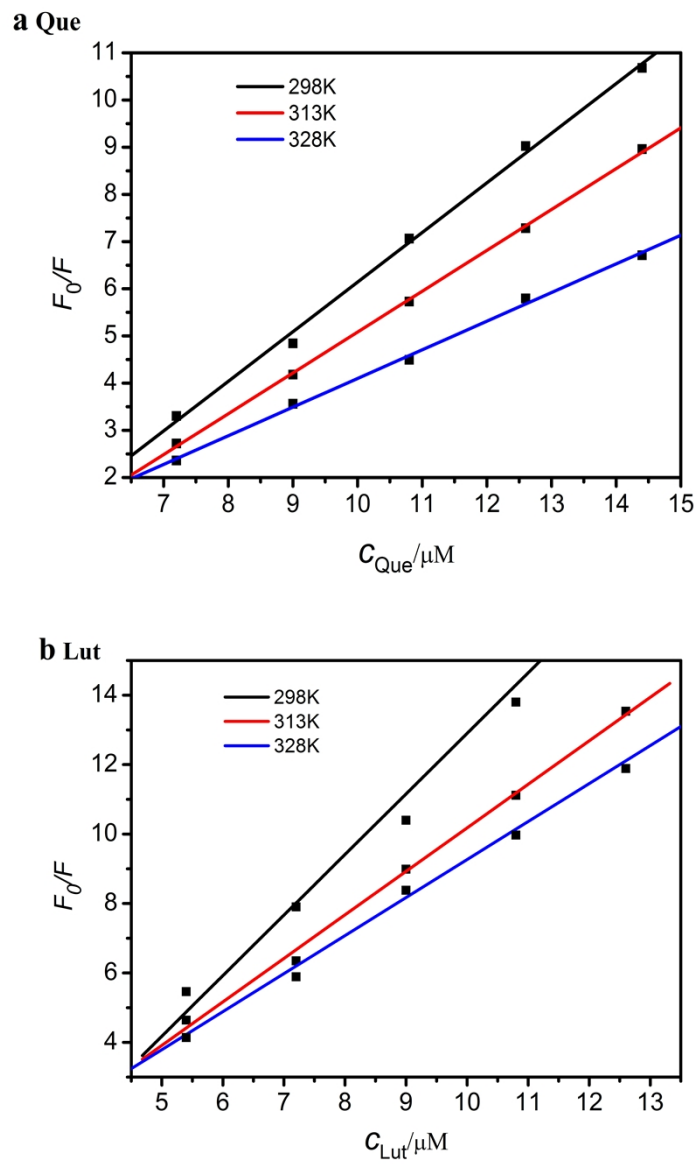

**Fig. S1** Plots of  $F_0/F$  versus concentrations of quercetin and luteolin.  $c_{\text{mptpy-Zn(II)}}$ , 2.1

$\mu\text{M}$ ;

**Table S1** Stern-Volmer quenching constants of the Que and Lut at different temperatures

| T/K | Que                                              |                                                                 |                |                 | Lut                                              |                                                                 |                |                 |
|-----|--------------------------------------------------|-----------------------------------------------------------------|----------------|-----------------|--------------------------------------------------|-----------------------------------------------------------------|----------------|-----------------|
|     | $K_{SV}$<br>[10 <sup>6</sup> L·M <sup>-1</sup> ] | $K_q$<br>[10 <sup>14</sup> L·M <sup>-1</sup> ·S <sup>-1</sup> ] | R <sup>a</sup> | SD <sup>b</sup> | $K_{SV}$<br>[10 <sup>6</sup> L·M <sup>-1</sup> ] | $K_q$<br>[10 <sup>14</sup> L·M <sup>-1</sup> ·S <sup>-1</sup> ] | R <sup>a</sup> | SD <sup>b</sup> |
| 298 | 1.052                                            | 3.987                                                           | 0.9985         | 0.02            | 1.744                                            | 6.606                                                           | 0.9911         | 0.04            |
| 313 | 0.8658                                           | 3.290                                                           | 0.9997         | 0.03            | 1.253                                            | 4.746                                                           | 0.9983         | 0.02            |
| 328 | 0.5852                                           | 2.217                                                           | 0.9919         | 0.02            | 1.095                                            | 4.148                                                           | 0.9976         | 0.03            |

a is the correlation coefficient, b is the standard deviation.  $c_{\text{mpipy-Zn(II)}}$ , 2.1  $\mu\text{M}$ ;

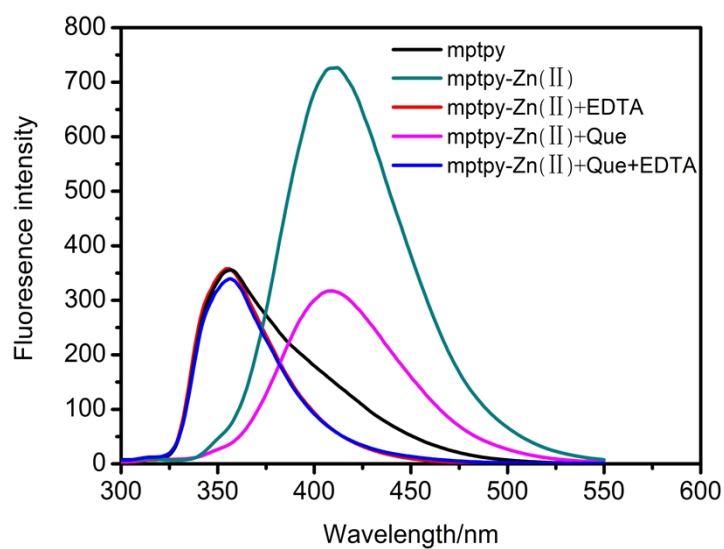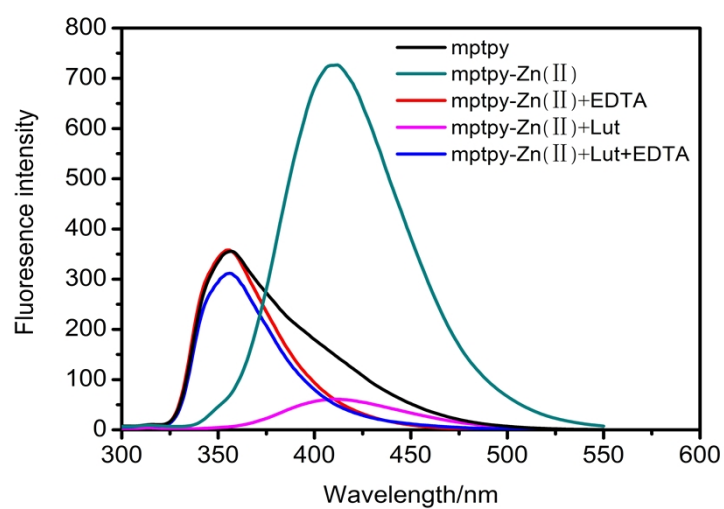

**Fig. S2** Changes of the fluorescence emission of mptpy when added to  $Zn^{2+}$ , luteolin, quercetin and EDTA in succession.  $c_{mptpy}$ , 2.1  $\mu M$ ;  $c_{Zn^{2+}}$ , 2.1  $\mu M$ ;  $c_{Lut}=c_{Que}$ , 9.0  $\mu M$ ;  $c_{EDTA}$ , 1 mM;  $\lambda_{ex}$ , 280 nm;

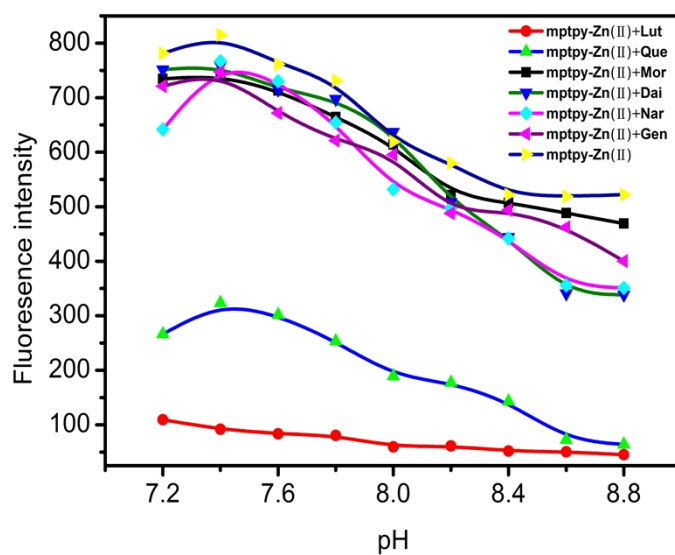

**Fig. S3** Effect of various pH on fluorescence of mptpy-Zn(II) in the absence and presence of various flavonoids.  $c_{\text{mptpy-Zn(II)}}$ , 2.1  $\mu\text{M}$ ;  $c_{\text{Gen}} = c_{\text{Nar}} = c_{\text{Dai}} = c_{\text{Que}} = c_{\text{Lut}}$ , 9.0  $\mu\text{M}$ ;  $\lambda_{\text{ex}}$ , 280 nm;  $\lambda_{\text{em}}$ , 409 nm.

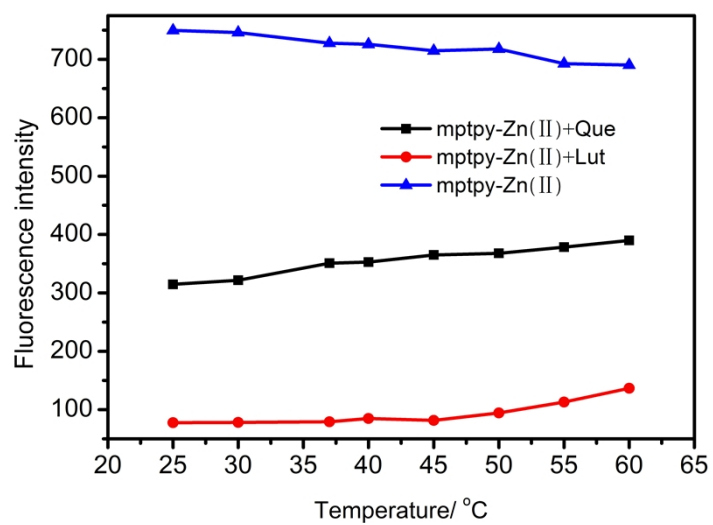

**Fig. S4** Effect of the temperature on fluorescence of mptpy-Zn(II) in the absence and presence of luteolin/queracetin.  $c_{\text{mptpy-Zn(II)}}$ , 2.1  $\mu\text{M}$ ;  $c_{\text{Que}}=c_{\text{Lut}}$ , 9.0  $\mu\text{M}$ ;  $\lambda_{\text{ex}}$ , 280 nm;  $\lambda_{\text{em}}$ , 409 nm; Tris-HCl, pH 7.4.

**Table S2** Effects of the coexisting substances

| substance                                       | $c_s/c_{Lut}$ | $(F-F_0)/F_0 \times 100(\%)$ | substance                                       | $c_s/c_{Lut}$ | $(F-F_0)/F_0 \times 100(\%)$ |
|-------------------------------------------------|---------------|------------------------------|-------------------------------------------------|---------------|------------------------------|
| Na <sup>+</sup> , CO <sub>3</sub> <sup>2-</sup> | 100           | 7.2                          | Na <sup>+</sup> , NO <sub>3</sub> <sup>-</sup>  | 80            | -1.6                         |
| Na <sup>+</sup> , HCO <sub>3</sub> <sup>-</sup> | 50            | -1.7                         | Na <sup>+</sup> , SO <sub>4</sub> <sup>2-</sup> | 60            | -0.3                         |
| Na <sup>+</sup> , Cl <sup>-</sup>               | 80            | 2.6                          | glucose                                         | 100           | 4.8                          |
| K <sup>+</sup> , Cl <sup>-</sup>                | 80            | 3.0                          | fructose                                        | 80            | 1.3                          |
| Ca <sup>2+</sup> , Cl <sup>-</sup>              | 60            | 4.2                          | sucrose                                         | 100           | 8.3                          |
| Mg <sup>2+</sup> , Cl <sup>-</sup>              | 80            | 3.8                          |                                                 |               |                              |

$c_{mptpy-Zn(II)}$ , 2.1  $\mu$ M;  $c_{luteolin}$ , 9.0  $\mu$ M;  $\lambda_{ex}$ , 280 nm;  $\lambda_{em}$ , 409 nm; Tris-HCl, pH 7.4.  
 $c_s$  is the concentration of substance,  $c_{Lut}$  is the concentration of luteolin.

$F_0$  and  $F$  are the fluorescence intensity of luteolin interacting with mptpy-Zn(II) in the absence and presence of the interfering substances, respectively.
